# Supplementary material for: Prevalence of Neutralising Antibodies to HCoV-NL63 in Healthy Adults in Australia
Source: MDPI journal article supplement (doi:10.3390/v13081618), 2021-08-16
Supplement: s1 [file s1]

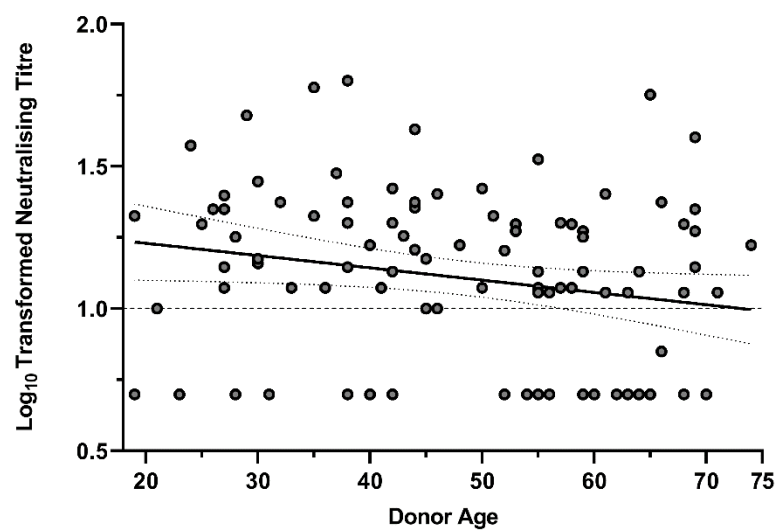

**Figure S1.** Log transformed GMT for 100 donors relative to age. Simple linear regression  $R^2 = 0.0428$  with significant deviation from zero ( $P = 0.0388$ ). Dotted lines indicate 95% Confidence Intervals, dashed line indicates lower limit of sensitivity at  $1.0 \log_{10}$ .
